# Supplementary material for: A Cross-Species Analysis in Pancreatic Neuroendocrine Tumors Reveals Molecular Subtypes with Distinctive Clinical, Metastatic, Developmental, and Metabolic Characteristics
Source: Oxford University Press journal article supplement (doi:10.1158/2159-8290.cd-15-0068), 2015-10-07
Supplement: 21598290cd150068-sup-144026_2_supp_3166611_nvr74z.docx [file 21598290cd150068-sup-144026_2_supp_3166611_nvr74z.docx]

**Supplementary Information:**

**A cross-species analysis in pancreatic neuroendocrine tumors reveals molecular subtypes with distinctive clinical, metastatic, developmental, and metabolic characteristics.**

Anguraj Sadanandam1,2,3,#, Stephan Wullschleger2, Costas A. Lyssiotis4,a, Carsten Grötzinger5, Stefano Barbi6, Samantha Bersani6, Jan Körner5, Ismael Wafy2, Andrea Mafficini6, Rita T. Lawlor6, Michele Simbolo6, John M. Asara7, Hendrik Bläker8, Lewis C. Cantley4, Bertram Wiedenmann5, Aldo Scarpa6,#, Douglas Hanahan2, #

1Swiss Institute of Bioinformatics (SIB), Lausanne, Switzerland

2Swiss Institute for Experimental Cancer Research (ISREC), Swiss Federal Institute of Lausanne (EPFL), Lausanne, Switzerland

3Division of Molecular Pathology, Institute of Cancer Research (ICR), London, UK

4Meyer Cancer Center, Weill Cornell Medical College, New York, USA

5Department of Hepatology and Gastroenterology, Charite, Campus Virchow-Klinikum, University Medicine, Berlin, Germany

6ARC-Net Research Centre and Department of Pathology and Diagnostics, University and Hospital Trust of Verona, Verona, Italy

7Department of Medicine, Beth Israel Deaconess Medical Center, Boston, Massachusetts, USA

8Institut für Pathologie, Charite, Campus Virchow-Klinikum, University Medicine, Berlin, Germany

aCurrent address: Department of Molecular and Integrative Physiology and Department of Internal Medicine, Division of Gastroenterology, University of Michigan, Ann Arbor, MI, USA

# Correspondence to:

**Douglas Hanahan, Ph.D.**

Swiss Institute for Experimental Cancer Research (ISREC),

Swiss Federal Institute of Lausanne (EPFL), Lausanne

EPFL SV ISREC CMSO

Station 19, Batiment SV

Lausanne, CH-1015

Switzerland

Ph: +41-21-693-0657

[douglas.hanahan@epfl.ch](mailto:douglas.hanahan@epfl.ch)

**Anguraj Sadanandam, Ph.D.**

Division of Molecular Pathology

Institute of Cancer Research (ICR)

15 Cotswold Road

Sutton, Surrey SM2 5NG

United Kingdom

Ph: +44-20-8915-6631

[anguraj.sadanandam@icr.ac.uk](mailto:anguraj.sadanandam@icr.ac.uk)

**Aldo Scarpa, M.D., Ph.D.**

ARC-NET Research Center for Applied Research on Cancer

Department of Pathology and Diagnostics

University and Hospital Trust of Verona

Piazzale L.A. Scuro, 10, 37134 Verona

Italy

Ph: +39-045-812-4043

aldo.scarpa@univr.it

*Running Title:* A cross-species pancreatic neuroendocrine tumor subtypes

*Type of manuscript:* Research article.

*Keywords:* Rip1-Tag2, subtypes, Ki67 index, NET grades, biomarkers, transcriptome, integrated omics analysis, proteomics, mutations, metabolomics, histopathology of PanNETs, cell-of-origin, tumor subtypes, EMT, tumor progression pathway, pyruvate metabolism, flux assay, patient samples, angiogenesis, genetically engineered mouse model, personalized medicine.

**Supplementary Information: Materials and Methods.**

**Processing of microarrays, data analysis and subtype identification.** The core clinical gene and miR expression datasets were from Missiaglia, *et al.* (GEO Omnibus accession number - **GSE73338)** (1) andRoldo, *et al*. (**GSE73350)** (2).

Affymetrix GeneChip® Human and Mouse Gene 1.0 ST arrays (Affymetrix, Santa Clara, CA, USA) were processed according to the manufacturer’s instructions. Patient (gene expression validation samples) RNA samples were quantitated, quality checked, amplified, hybridized to Affymetrix Human Gene 1.0 ST arrays and scanned by Lausanne Genomic Technologies Facility, Center for Integrative genomics (CIG), University of Lausanne, Lausanne, Switzerland. Mouse RNA samples were similarly processed using Affymetrix Mouse Gene 1.0 ST arrays by the UCSF Genomics Core Facilities, University of California San Francisco, San Francisco, USA.

The Robust Multi-array Analysis (RMA) of human Affymetrix microarrays were analyzed using a statistical framework R and Bioconductor (3) as described earlier (4, 5) and mouse microarrays using aroma.affymetrix (6). The normalized data for human samples are available at GEO Omnibus with accession number **GSE73339 and for mouse samples - GSE73514.**

Agilent Human miRNA Microarrays (based on miRBase release 16; Agilent Technologies) were processed according to the protocols provided by the manufacturer. 100 ng total RNA from each sample (miR validation samples) was labeled according to the Agilent miRNA Complete Labeling and Hybridization Kit. The labeled RNAs were hybridized to Agilent human miRNA microarrays for 20 hours at 55°C with rotation. After hybridization and washing the arrays were scanned with an Agilent microarray scanner using high dynamic range settings as specified by the manufacturer. Agilent Feature Extraction Software v 10.7.3.1 was used to extract the data. Normalization of the Agilent Human miRNA Microarrays profile data were performed as described (7) with the following modification. In order to avoid taking the logarithm (log) of zero and of values between zero and one, we added a small constant, 10, to the raw data values, such that all resulting values were greater than one (except those from the blank control). After this shift, the data were log2 transformed followed by normalization of the data to the same scale, using a quantile method that is available in the R based Bioconductor package “preprocessCore” (8). These procedures were performed by Lausanne Genomic Technologies Facility, Center for Integrative genomics (CIG), University of Lausanne, Switzerland. The normalized data for human samples are available at GEO Omnibus with accession number **GSE73367. Two different batches of Agilent arrays were batch corrected using ComBat** (9)**.**

For subtype identification, the variable genes (from core clinical gene expression dataset) with SD > 0.8 or miRs (from core clinical miR expression dataset) with SD > 0.5 from the normalized data were median-centered across samples for each gene and analyzed using the non-negative matrix factorization (NMF) algorithm (10) as described in our previous studies (4, 5). Significant Analysis of Microarrays (SAM) analysis (11) was performed to identify significant features (mRNA or miR) that are differentially expressed between subtypes, as described previously (4, 5). For (both gene and miR) validation datasets, SAM genes from the core clinical datasets were mapped followed by NMF analysis for subtype identification. Clusters were generated using Gene Cluster 3.0 (12) and heatmaps were generated using Genepattern-based Hierarchical Clustering Viewer (13).

**Merging of microarray data.** ComBat (9) and distance weighted discrimination (DWD) algorithms (14, 15) were used to correct the batch effects and merge human and mouse gene expression data. DWD was applied after sample or column minimal value-based centering and row or gene expression median-based centering. The data was column normalized to N(0,1) and row median centered after DWD analysis. These were performed as described in our previous publications (4, 5, 16). For merging the human and mouse data, we used official gene names from HUGO Gene Nomenclature Committee (HGNC) as references.

**Cross-comparison of gene expression and miR subtypes.** The hypergeometric test was performed using R based phyper library (17) for enrichment of samples between gene expression and miR subtypes, and the p values were plotted as a heatmap using the statistical framework R as described (18).

**RNA isolation and qRT-PCR analysis.** Total RNA was isolated using the miReasy kit (Qiagen, Hombrechtikon, Switzerland) or Ambion RiboPure kit (Life Technologies, Zug, Switzerland), and reverse transcription was performed using Superscript II (Life Technologies) as per the manufacturer’s instructions. qRT-PCR was performed using Qiagility (automated PCR setup, Qiagen), QuantiTect SYBR Green PCR kit (Qiagen), gene-specific primers (**Supplementary Table 4**) and a Rotor-Gene Q real time PCR machine (Qiagen). All qRT-PCR gene expression data were normalized to the levels of the housekeeping gene RPL13A or PPIA. The RNA integrity was assessed by NanoDrop 2000 (Thermo Scientific) and RNA Pico/Nano chip analysis using Agilent Bioanalyzer (Agilent Technologies).

**RIP1-Tag2 (RT2) transgenic mouse model of PanNET.** The breeding and generation of RT2 mice has been described previously (19). While majority of the mice in this study were on a C57Bl/6 background, which is typically used for this model, we also crossed C57BL/6J (B6) RT2 mice with A/J (B6AF1) or DBA/2J (B6D2F1) mice to produce F1 mice. All animal research was performed under the auspices of animal protocols approved by Experience sur animaux (EXPANIM) – Service de la consommation et des Affaires veterinaries (SCAV) in Switzerland.

**Isolation of RT2 tumor and pre-malignant lesions.** RT2 mouse PanNET tumors and liver metastases were dissected out of 14- to 21-wk-old RT2 mice and either snap-frozen in liquid nitrogen for DNA, RNA and protein isolation or formalin fixed and paraffin embedded for IHC as described previously (20, 21). Normal, hyperplastic, and angiogenic islets were isolated as described previously (20, 22) and snap-frozen in liquid nitrogen.

**RT2 mouse tumor cell lines:** βTC cell lines were previously derived from RT2 mouse model (23). These cell lines (passages between 20 and 30) were authenticated by growth, morphological characteristics and insulin gene and protein expression. These were also tested for mycoplasma using two different kits (MycoProbe™ Mycoplasma Detection Kit  (R&D Systems, Minneapolis, MN, USA) and PCR Mycoplasma test kit (Biological Industries, Kibbutz Beit-Haemek, Israel).

**Laser capture microdissection.** Snap frozen pancreatic sections (10µm) from 15-week old RT2 mice were mounted onto PET-membrane slides (MMI). Sections were incubated with ice-cold 70% ethanol and stained with cresyl violet. Individual tumors were microdissected using a PALM laser dissecting microscope (Zeiss, Feldbach, Switzerland). 100ng of total RNA was subjected to microarray experiments using Affymetrix GeneChip Mouse Gene 1.0 ST arrays.

**Human tissue microarray (TMA) analysis.** A human TMA containing pancreatic tumor samples were obtained from US Biomax (Rockville, MD, USA; #PA 2081a) and subjected to IHC analysis as described below.

**Immunohistochemistry (IHC).** IHC was performed as described in our previous studies (5, 24, 25) using the following primary antibodies: anti-Enpp2 (#10005375, Cayman Chemical, Ann Arbor, MI), 1:500; anti-CD31 (#DIA-310, Dianova GmbH, Hamburg, Germany), 1:40; anti-Ki67 (MIB1 antibody; DBA, Milan, Italy; for human samples; reference (1)); anti-Ki67 (#16667, Abcam, Cambridge, MA, USA), 1:100 (for mouse samples); anti-insulin (#A0564, DAKO), 1:250; anti-HK1 (#2024, Cell Signaling Technology, Danvers, MA, USA), 1:250; and anti-SV40-Tag polyclonal antibody (in house production), 1:1000. Slides were imaged using a Leica DM 5500 B microscope (Leica, St. Gallen, Switzerland). For Ki67 scoring of the human PanNET specimens, the area with the highest density of Ki67-positive cells was defined. Ki67 was then assessed by scoring at least 2,000 tumor cells in the selected areas, after which the percentage of positive cells was calculated as previously described (1). For mouse samples, ImageJ software was used to count the total number of Ki67 positive cells normalized to hematoxylin-stained cells. The number of CD31 positive blood vessels in random 20X magnification fields was determined independently by two investigators, and averaged.

**Immunoblotting.** 1g of total protein lysate extracted from laser capture microdissected tumor samples or 10g of cell lysate of TC cells was separated on a Mini-Protean TGX gel (Bio-Rad Laboratories AG, Fribourg, Switzerland) and subjected to immunoblot analysis using antibodies against HK1 (#2024, Cell Signaling Technology), insulin (#A0564, DAKO), PC (#ab126707, Abcam) and -actin (**#**4967, Cell Signaling Technology).

**Proliferation assay.** Cells were plated (5 x 103) into 96-well plates in DMEM Glutmax with 10% FBS media (Life Technologies) at day 0. The following day (day 1), glucose-dropout media (Life Technologies) was added, and the cells were assayed by CellTiter-Glo on day 3, as described in our previous studies (4, 5).

**Metabolic profiling.** To characterize central carbon metabolism, targeted LC-MS/MS was performed (26). Briefly, βTC cells were grown in DMEM (25mM glucose, 2mM glutamine, without pyruvate) to 80% confluency, and metabolites were extracted using 80% methanol at dry ice temperatures. Metabolite fractions were normalized to protein concentration from a biological replicate processed in parallel. For 13C-labeling experiments, cells were grown in DMEM (without pyruvate, glucose and glutamine) in the presence of 10% dialyzed FBS, supplemented with 13C-glucose (25mM; Cambridge Isotope Laboratories, Tewksbury, MA; #CLM-1396) for 20hrs.

**Next-Generation Sequencing.** Human DNA samples were analyzed with a panel targeting all coding sequences of *MEN1*, *ATRX*, *DAXX*, *PTEN*, *TSC2* and *ATM*, and mouse (tumor and normal) samples were similarly analyzed with a panel to detect mutations in the *Atrx* and *Daxx* genes.DNA was prepared from human tumor tissue after neoplastic cell enrichment to about 70%, by manually microdissecting 10 consecutive 4-µm FFPE sections. The mouse tumors were microdissected for enrichment of neoplastic cells, as described above. Next-generation targeted sequencing was performed as previously described (27) using an Ion AmpliSeq custom panel (Life Technologies). Twenty nanograms of DNA were used for each multiplex PCR amplification. Sequencing was performed on an Ion Torrent Personal Genome Machine (PGM, Life Technologies) loaded with 318 chips. Data analysis was done using the Torrent Suite Software v.3.6 (Life Technologies). Those filtered mutations/variants were annotated using the SnpEff software v.3.1 (28). Alignments of the DNA sequence were visually verified with the Integrative Genomics Viewer; IGV v.2.2 (29, 30).

**Proteomic analyses by mass spectrometry.** Proteins from laser capture microdissected tumor sections were extracted using 0.1 % RapiGest SF Surfactant (Waters, Baden-Dättwil, Switzerland) reagent. Protein extracts were in-solution digested as previously described (31). The reaction was stopped and RapiGest was cleaved by adding pure trifluoroacetic acid (TFA) during a final one hour incubation at 37°C. Peptides were desalted using stageTips (32) and dried using a vacuum concentrator. For LC-MS/MS analysis, resuspended peptides were separated by reverse phase chromatography on a Dionex Ultimate 3000 RSLC nano UPLC system connected in-line with an Orbitrap Fusion (Thermo Fisher Scientific, Waltham,USA). Database searches were performed using Mascot (Matrix Science, Boston, USA), MS-Amanda (33) and SEQUEST in Proteome Discoverer v.1.4. against a mouse UniProt protein database. Data was further processed and inspected in ScaffoldTM 4.4.1.1 (Proteome Software, Portland, USA).

**Supplementary Figure Legends.**

**Supplementary Figure 1. NMF analysis of PanNET miR expression and its validation. (A.)** NMF analysis of PanNET core clinical miR expression data set (n=40). (**B.)** NMF analysis of the independent validation dataset of human PanNET miR expression (n=50). (**C.)** Heatmap showing validation of three PanNET miR expression subtypes using the independent validation data set (n=50). In the rainbow bar beneath the heatmaps, red indicates elevated expression, blue decreased, and white no change. PanNETassigner-miR signatures associated with this dataset are listed in the same order in **Supplementary Table 1b**.

**Supplementary Figure 2. NMF analysis of PanNET gene expression and its validation. (A.)** NMF analysis of the PanNET core (‘training’) clinical gene expression dataset (n=86). (**B.)** NMF analysis of the validation dataset of human PanNET gene expression data (n=29). (**C.)** Heatmap confirming the existence of three PanNET gene expression subtypes using the independent validation data set (n=29). In the rainbow bar beneath the heatmaps, red indicates elevated expression, blue decreased, and white no change. PanNETassigner-mRNA signatures associated with the subtypes in the heatmap are listed in the same order in **Supplementary Table 1e.**

**Supplementary Figure 3. Cross-species analysis of gene expression subtypes in human and mouse PanNETs.** Heatmap showing cross-species analysis and association of human (IT, MLP and intermediate; from core clinical gene expression dataset; n=72) and mouse RT2 PanNET (IT and MLP; n=10) subtypes using DWD-merged gene expression profiles. In all the heatmaps, the rows indicate differentially expressed genes amongst the profiled transcriptomes. In the rainbow bar beneath the heatmaps, red indicates elevated expression, blue decreased, and white no change. Genes and samples in the same order as that of the heatmap are shown in **Supplementary Table 1i**.

**Supplementary Figure 4.** ENPP2 and INS mRNA expression in human PanNET subtypes as assessed using human PanNET core clinical gene expression microarray dataset.

**Supplementary Figure 5. Comparison of mouse PanNET subtypes to microdissected invasive IT vs. non-invasive IC2 of mouse PanNET tumors: Relationship to PanNET histotypes and progenitor gene signatures.** **(A.)** A heatmap of hierarchical clustering of DWD merged gene expression profiles from RT2 progression stages (including IT, MLP and met samples) and microdissected highly invasive IC2 and non-invasive IT of RT2 tumors (from published data (21)). **(B.)** A heatmap showing expression of genes that distinguish progenitor (including metabolic and EMT) from EMT and mature  cell genes in microdissected non-invasive (from IT) and invasive (IR; from IC2) regions of RT2 tumors (samples and microarray data from Chun et al., (21)).

**Supplementary Figure 6. Metabolic profiles of IT and MLP cell lines. (A-B.)** Heatmap showing hierarchical clustering of samples with metabolites (with SD>0.2) from LC-MS/MS analyses that are differentially abundant between (**A.**) MLP (TC1b) and IT (TC4), and (**B.**) MLP (TC1e) and IT (TC3) cell lines. The experiments in (**A.**) and (**B.**) were done as different batches and hence, were analyzed separately. The analyses were performed in triplicate for each sample.

**Supplementary Table Legends.**

**Supplementary Table 1. Underlying data from microRNA and mRNA transcriptome profiling of human and mouse PanNET samples associated with the main and supplementary figures. (a-b.)** microRNA profiles and PanNETassigner-miR signatures from (**a.)** human PanNET core (‘training’) clinical miR dataset (n=40) in the same order top to bottom as in **Figure 1A**, and (**b.)** from the human miRNA validation dataset (n=50), in the same order top to bottom as in **Supplementary Figure 1C. (c.)** Gene expression profiles and PanNETassigner-mRNA signatures from human PanNET core clinical gene expression dataset (n=86) in the same order from top to bottom as in **Figure 2A**. **(d.)** Human PanNET core clinical gene expression dataset (n=72), with combined MLP-1 plus MLP-2 subtypes as one class and IT and intermediate as other class and their associated genes are in the same order as in **Figure 2B**. (**e.)** Gene expression profiles and PanNETassigner-mRNA signatures from the human gene expression validation (n=29) dataset, in the same order top to bottom as in **Supplementary Figure 2C. (f.)** mRNA profiles and genes associated with different progression stages of RT2 mouse model, in the same order top to bottom as in **Figure 2E**. (**g.)** mRNA profiles and signatures (m-PanNETassigner-mRNA) from mouse (RT2) PanNET subtypes (IT and MLP) in the same order top to bottom as in **Figure 2F**. **(h-i.)** Merged gene expression profiles of human (only tumor samples) and mouse (only IT and MLP) using (**h.**) ComBat (in the same order top to bottom as in **Figure 2G)** and (**i.**) DWD (in the same order top to bottom as in **Supplementary** **Figure 3)**.

**Supplementary Table 2. Patient and tumor characteristics of the core clinical samples used in the miR and mRNA profiling.** The dataset includes clinical syndrome, mutations, gender, age at diagnosis, sporadic or familial cancer, site of tumor, percent Ki67-positive cells and NET grades.

**Supplementary Table 3.**

a) Evaluation of Insulin and Enpp2 IHC staining of human PanNET TMA. ‘-‘ indicates no staining, ‘+’ weak staining, ‘++’ intermediate staining, ‘+++’ strong staining.

b) Protein expression levels determined by global proteomic analysis of micro dissected IT and Ins-lo MLP tumor samples from RT2 mice. The number of unique peptides, the normalized total spectrum and the fold change comparing IT to Ins-lo MLP are depicted.

**Supplementray Table 4.** List of primer sequences used in this study.

**References.**

1. Missiaglia E, Dalai I, Barbi S, Beghelli S, Falconi M, della Peruta M, et al. Pancreatic endocrine tumors: expression profiling evidences a role for AKT-mTOR pathway. J Clin Oncol. 2010;28:245-55.

2. Roldo C, Missiaglia E, Hagan JP, Falconi M, Capelli P, Bersani S, et al. MicroRNA expression abnormalities in pancreatic endocrine and acinar tumors are associated with distinctive pathologic features and clinical behavior. J Clin Oncol. 2006;24:4677-84.

3. Gentleman RC, Carey VJ, Bates DM, Bolstad B, Dettling M, Dudoit S, et al. Bioconductor: open software development for computational biology and bioinformatics. Genome biology. 2004;5:R80.

4. Collisson EA, Sadanandam A, Olson P, Gibb WJ, Truitt M, Gu S, et al. Subtypes of pancreatic ductal adenocarcinoma and their differing responses to therapy. Nature medicine. 2011;17:500-3.

5. Sadanandam A, Lyssiotis CA, Homicsko K, Collisson EA, Gibb WJ, Wullschleger S, et al. A colorectal cancer classification system that associates cellular phenotype and responses to therapy. Nature medicine. 2013;19:619-25.

6. Bengtsson H, Simpson K, Bullard J, Hansen K. aroma.affymetrix: A generic framework in R for analyzing small to very large Affymetrix data sets in bounded memory. Tech Report #745 Department of Statistics, University of California, Berkeley, February 2008.

7. Pradervand S, Weber J, Thomas J, Bueno M, Wirapati P, Lefort K, et al. Impact of normalization on miRNA microarray expression profiling. RNA (New York, NY. 2009;15:493-501.

8. Bolstad BM, Irizarry RA, Astrand M, Speed TP. A comparison of normalization methods for high density oligonucleotide array data based on variance and bias. Bioinformatics (Oxford, England). 2003;19:185-93.

9. Johnson WE, Li C, Rabinovic A. Adjusting batch effects in microarray expression data using empirical Bayes methods. Biostatistics (Oxford, England). 2007;8:118-27.

10. Brunet JP, Tamayo P, Golub TR, Mesirov JP. Metagenes and molecular pattern discovery using matrix factorization. Proceedings of the National Academy of Sciences of the United States of America. 2004;101:4164-9.

11. Tusher VG, Tibshirani R, Chu G. Significance analysis of microarrays applied to the ionizing radiation response. Proceedings of the National Academy of Sciences of the United States of America. 2001;98:5116-21.

12. Eisen MB, Spellman PT, Brown PO, Botstein D. Cluster analysis and display of genome-wide expression patterns. Proceedings of the National Academy of Sciences of the United States of America. 1998;95:14863-8.

13. Reich M, Liefeld T, Gould J, Lerner J, Tamayo P, Mesirov JP. GenePattern 2.0. Nature genetics. 2006;38:500-1.

14. Benito M, Parker J, Du Q, Wu J, Xiang D, Perou CM, et al. Adjustment of systematic microarray data biases. Bioinformatics (Oxford, England). 2004;20:105-14.

15. Herschkowitz JI, Simin K, Weigman VJ, Mikaelian I, Usary J, Hu Z, et al. Identification of conserved gene expression features between murine mammary carcinoma models and human breast tumors. Genome biology. 2007;8:R76.

16. Sadanandam A, Futakuchi M, Lyssiotis CA, Gibb WJ, Singh RK. A cross-species analysis of a mouse model of breast cancer-specific osteolysis and human bone metastases using gene expression profiling. BMC cancer. 2011;11:304.

17. Kachitvichyanukul V, Kotz S, Kemp AW. Computer generation of hypergeometric random variates. Journal of Statistical Computation and Simulation. 1992;22:127-45.

18. Sadanandam A, Wang X, de Sousa EMF, Gray JW, Vermeulen L, Hanahan D, et al. Reconciliation of classification systems defining molecular subtypes of colorectal cancer: Interrelationships and clinical implications. Cell cycle. 2014;13.

19. Hanahan D. Heritable formation of pancreatic beta-cell tumours in transgenic mice expressing recombinant insulin/simian virus 40 oncogenes. Nature. 1985;315:115-22.

20. Olson P, Lu J, Zhang H, Shai A, Chun MG, Wang Y, et al. MicroRNA dynamics in the stages of tumorigenesis correlate with hallmark capabilities of cancer. Genes & development. 2009;23:2152-65.

21. Chun MG, Hanahan D. Genetic deletion of the desmosomal component desmoplakin promotes tumor microinvasion in a mouse model of pancreatic neuroendocrine carcinogenesis. PLoS genetics. 2010;6.

22. Parangi S, Dietrich W, Christofori G, Lander ES, Hanahan D. Tumor suppressor loci on mouse chromosomes 9 and 16 are lost at distinct stages of tumorigenesis in a transgenic model of islet cell carcinoma. Cancer Res. 1995;55:6071-6.

23. Efrat S, Linde S, Kofod H, Spector D, Delannoy M, Grant S, et al. Beta-cell lines derived from transgenic mice expressing a hybrid insulin gene-oncogene. Proceedings of the National Academy of Sciences of the United States of America. 1988;85:9037-41.

24. Sadanandam A, Varney ML, Singh S, Ashour AE, Moniaux N, Deb S, et al. High gene expression of semaphorin 5A in pancreatic cancer is associated with tumor growth, invasion and metastasis. International journal of cancer. 2010;127:1373-83.

25. Sadanandam A, Sidhu SS, Wullschleger S, Singh S, Varney ML, Yang CS, et al. Secreted semaphorin 5A suppressed pancreatic tumour burden but increased metastasis and endothelial cell proliferation. British journal of cancer. 2012;107:501-7.

26. Yuan M, Breitkopf SB, Yang X, Asara JM. A positive/negative ion-switching, targeted mass spectrometry-based metabolomics platform for bodily fluids, cells, and fresh and fixed tissue. Nature protocols. 2012;7:872-81.

27. Amato E, Molin MD, Mafficini A, Yu J, Malleo G, Rusev B, et al. Targeted next-generation sequencing of cancer genes dissects the molecular profiles of intraductal papillary neoplasms of the pancreas. The Journal of pathology. 2014;233:217-27.

28. Cingolani P, Platts A, Wang le L, Coon M, Nguyen T, Wang L, et al. A program for annotating and predicting the effects of single nucleotide polymorphisms, SnpEff: SNPs in the genome of Drosophila melanogaster strain w1118; iso-2; iso-3. Fly. 2012;6:80-92.

29. Robinson JT, Thorvaldsdottir H, Winckler W, Guttman M, Lander ES, Getz G, et al. Integrative genomics viewer. Nature biotechnology. 2011;29:24-6.

30. Thorvaldsdottir H, Robinson JT, Mesirov JP. Integrative Genomics Viewer (IGV): high-performance genomics data visualization and exploration. Briefings in bioinformatics. 2013;14:178-92.

31. Chopra T, Hamelin R, Armand F, Chiappe D, Moniatte M, McKinney JD. Quantitative mass spectrometry reveals plasticity of metabolic networks in Mycobacterium smegmatis. Molecular & cellular proteomics : MCP. 2014;13:3014-28.

32. Rappsilber J, Mann M, Ishihama Y. Protocol for micro-purification, enrichment, pre-fractionation and storage of peptides for proteomics using StageTips. Nature protocols. 2007;2:1896-906.

33. Dorfer V, Pichler P, Stranzl T, Stadlmann J, Taus T, Winkler S, et al. MS Amanda, a universal identification algorithm optimized for high accuracy tandem mass spectra. Journal of proteome research. 2014;13:3679-84.
