# Supplementary material for: A Cross-Species Analysis in Pancreatic Neuroendocrine Tumors Reveals Molecular Subtypes with Distinctive Clinical, Metastatic, Developmental, and Metabolic Characteristics
Source: Oxford University Press journal article supplement (doi:10.1158/2159-8290.cd-15-0068), 2015-10-07
Supplement: 21598290cd150068-sup-144026_2_supp_3166825_nvh38t.xlsx [file 21598290cd150068-sup-144026_2_supp_3166825_nvh38t.xlsx]

## Sheet: Human Core data Patient info
Supplementary Table 2. Patient and tumor characteristics of the core clinical samples used in miR and gene expression profiling.
Sample mRNA profile ID	Lab ID	Patient number	material used in expression profile study	Clinical syndrome	MUTATIONS	Gender	Age at diagnosis	Sporadic/Familial	Site of Tumor	Malignancy*	% Ki67 cells	WHO Class-Grading
33	K1	VR17	primary tumor	Non-Functional	MEN1	F	17	MEN1 SYNDROME	Head	no	0.01	NET-G1
34	K10	VR42	primary tumor	Non-Functional	none	F	67	sporadic	Head	no	0.02	NET-G1
35	K11	VR1	primary tumor	Insulinoma	none	F	47	sporadic	Body	no	0.01	NET-G1
36	K12	VR61	primary tumor	Non-Functional	none	F	68	sporadic	Body/Tail	malignant	0.03	NET-G2
37	K13	VR18	primary tumor	Non-Functional	none	F	66	sporadic	Head	no	0.02	NET-G1
38	K14	VR43	primary tumor	Non-Functional	ATRX, PTEN, MEN1	M	48	sporadic	Body/Tail	malignant	0.04	NET-G2
39	K15	VR44	primary tumor	Non-Functional	DAXX	M	44	sporadic	Body/Tail	malignant	0.2	NET-G2
40	K16	VR45	primary tumor	Non-Functional	none	M	48	sporadic	Head	malignant	0.03	NET-G2
41	K17	VR2	primary tumor	Insulinoma	MEN1, TSC2	F	79	sporadic	Tail	no	0.01	NET-G1
42	K18	VR3	primary tumor	Insulinoma	ATM	F	69	sporadic	Body	no	0.01	NET-G1
44	K19	VR46	primary tumor	Non-Functional	ATM	F	37	sporadic	Head	malignant	0.3	NET-G3
46	K2	VR19	primary tumor	Non-Functional	none	M	69	sporadic	Head	no	0.01	NET-G1
47	K20	VR4	primary tumor	Insulinoma	none	F	27	sporadic	Body	no	0.03	NET-G2
48	K21	VR20	primary tumor	Non-Functional	MEN1	F	52	sporadic	Tail	no	0.01	NET-G1
49	K23	VR21	primary tumor	Non-Functional	DAXX, MEN1	M	56	sporadic	Body/Tail	malignant	0.03	NET-G2
50	K24	VR22	primary tumor	Non-Functional	ATRX	F	49	sporadic	Tail	no	0.01	NET-G1
51	K25	VR47	primary tumor	Non-Functional	PTEN, MEN1, ATRX	F	61	sporadic	Body	malignant	0.02	NET-G1
52	K26	VR5	primary tumor	Non-Functional	none	F	43	sporadic	Head	malignant	0.01	NET-G1
53	K27	VR70	primary tumor	Non-Functional	none	M	50	sporadic	Tail	no	0.2	NET-G2
54	K28	VR62	primary tumor	Non-Functional	TSC2	M	33	sporadic	Head	no	0.01	NET-G1
55	K29	VR48	primary tumor	Insulinoma	ARTX	F	47	sporadic	Body/Tail	malignant	0.18	NET-G2
56	K3	VR49	primary tumor	Non-Functional	none	M	42	sporadic	Body/Tail	malignant	0.07	NET-G2
57	K31	VR50	primary tumor	Non-Functional	ATRX, PTEN	F	54	sporadic	Tail	malignant	0.15	NET-G2
58	K32	VR23	primary tumor	Non-Functional	DAXX, MEN1	F	61	sporadic	Tail	malignant	0.15	NET-G2
59	K33	VR6	primary tumor	Insulinoma	none	F	73	sporadic	Body	no	0.01	NET-G1
60	K35	VR7	primary tumor	Non-Functional	MEN1	M	40	sporadic	Tail	no	0.02	NET-G1
61	K36	VR8	primary tumor	Insulinoma	ATM, TSC2	M	23	sporadic	Body	no	0.01	NET-G1
62	K37	VR63	primary tumor	Non-Functional	none	M	35	sporadic	Head	malignant	0.01	NET-G1
63	K38	VR71	primary tumor	Non-Functional	none	M	71	sporadic	Head	no	0.02	NET-G1
64	K39	VR24	primary tumor	Non-Functional	MEN1	M	47	sporadic	Tail	no	0.01	NET-G1
65	K4	VR25	primary tumor	Non-Functional	MEN1	F	29	MEN1 SYNDROME	Head/Tail	no	0.01	NET-G1
66	K40	VR64	primary tumor	Non-Functional	none	F	65	sporadic	Head	no	0.01	NET-G1
67	K41	VR26	primary tumor	Non-Functional	ATRX	M	39	sporadic	Body	no	0.02	NET-G1
68	K42	VR27	primary tumor	Non-Functional	MEN1	F	65	sporadic	Head	malignant	0.01	NET-G1
69	K43	VR51	primary tumor	Non-Functional	ATRX, MEN1	M	53	sporadic	Head	malignant	0.1	NET-G2
70	K45	VR28	primary tumor	Non-Functional	ATRX	F	71	sporadic	Head	no	0.01	NET-G1
71	K47	VR72	primary tumor	Insulinoma	ATM	M	67	sporadic	Body	no	0.01	NET-G1
72	K48	VR29	primary tumor	Non-Functional	none	M	49	sporadic	Body/Tail	malignant	0.02	NET-G1
73	K49	VR30	primary tumor	Non-Functional	ATRX, PTEN, MEN1	M	44	sporadic	Body/Tail	malignant	0.08	NET-G2
74	K5	VR52	primary tumor	Non-Functional	ATM, TSC2	F	53	sporadic	Body/Tail	malignant	0.06	NET-G2
75	K50	VR65	primary tumor	Non-Functional	none	F	64	sporadic	Head	malignant	0.03	NET-G2
84	K6	VR53	primary tumor	Non-Functional	ATM	F	52	sporadic	Body/Tail	malignant	0.06	NET-G2
86	K61	VR54	primary tumor	Non-Functional	TSC2	F	25	VHL SYNDROME	Head	no	0.02	NET-G1
87	K63	VR9	primary tumor	Non-Functional	none	M	59	sporadic	Body	no	0.01	NET-G1
89	K64	VR31	primary tumor	Non-Functional	DAXX	F	70	sporadic	Body/Tail	no	0.01	NET-G1
90	K65	VR55	primary tumor	Non-Functional	TSC2	M	74	sporadic	Body/Tail	malignant	0.4	NET-G3
92	K66	VR10	primary tumor	Insulinoma	none	M	34	sporadic	Tail	no	0.01	NET-G1
93	K67	VR56	primary tumor	Non-Functional	none	F	59	sporadic	Head	malignant	0.05	NET-G2
94	K69	VR11	primary tumor	Insulinoma	ATM	M	68	sporadic	Tail	no	0.02	NET-G1
95	K7	VR32	primary tumor	Non-Functional	ATM	F	57	sporadic	Head	no	0.03	NET-G2
96	K70	VR66	primary tumor	Non-Functional	ATM	F	61	sporadic	Head	no	0.05	NET-G2
97	K75	VR33	primary tumor	Non-Functional	MEN1	F	70	sporadic	Body	no	0.01	NET-G1
98	K76	VR34	primary tumor	Non-Functional	DAXX, MEN1	F	41	MEN1 SYNDROME	Body	malignant	0.05	NET-G2
99	K8	VR35	primary tumor	Non-Functional	MEN1	F	42	MEN1 SYNDROME	Body	no	0.01	NET-G1
100	K80	VR12	primary tumor	Insulinoma	none	F	35	sporadic	Body	no	0.01	NET-G1
101		Normal Islet	normal islet	Normal Islets
102	K9	VR57	primary tumor	Non-Functional	none	F	70	sporadic	Body/Tail	malignant	0.22	NET-G3
108		Normal Islet	normal islet	Normal Islets
109		Normal Islet	normal islet	Normal Islets
110		Normal Islet	normal islet	Normal Islets
112	Q1	VR58	primary tumor	Non-Functional	none	F	50	sporadic	Head	malignant	0.25	NET-G3
114	Q10	VR59	primary tumor	Non-Functional	ATRX	F	43	sporadic	Head	malignant	0.02	NET-G1
115	Q11	VR36	primary tumor	Non-Functional	none	F	55	sporadic	Body	no	0.01	NET-G1
116	Q12	VR37	primary tumor	Non-Functional	DAXX	M	57	sporadic	Body	malignant	0.02	NET-G1
117	Q13	VR13	primary tumor	Non-Functional	none	F	65	sporadic	Head	no	0.02	NET-G1
118	Q14	VR14	primary tumor	Insulinoma	none	M	41	sporadic	Head	no	0.03	NET-G2
119	Q15	VR67	primary tumor	Gastrinoma	none	M	41	sporadic	Head	malignant	0.01	NET-G1
120	Q16	VR60	primary tumor	Non-Functional	none	M	71	sporadic	Head	malignant	0.07	NET-G2
121	Q17	VR73	primary tumor	Insulinoma	none	F	62	sporadic	Body	no	0.02	NET-G1
122	Q18	VR74	primary tumor	Non-Functional	none	M	71	sporadic	Tail	malignant	0.01	NET-G1
123	Q2	VR15	primary tumor	Insulinoma	MEN1	M	52	sporadic	Body/Tail	no	0.02	NET-G1
124	Q3	VR38	primary tumor	Non-Functional	DAXX, MEN1	F	46	sporadic	Body/Tail	malignant	0.05	NET-G2
125	Q4	VR75	primary tumor	Insulinoma	TSC2	F	64	sporadic	Body	no	0.01	NET-G1
126	Q5	VR68	primary tumor	Non-Functional	ATM	M	38	sporadic	Head	malignant	0.03	NET-G2
127	Q6	VR16	primary tumor	Insulinoma	none	M	51	sporadic	Tail	no	0.01	NET-G1
128	Q7	VR39	primary tumor	Non-Functional	none	M	73	sporadic	Head	no	0.02	NET-G1
129	Q8	VR40	primary tumor	Non-Functional	none	F	56	sporadic	Body/Tail	no	0.01	NET-G1
130	Q9	VR41	primary tumor	Non-Functional	ATRX	M	75	sporadic	Tail	malignant	0.02	NET-G1
131	V1	Liver metastasis of patient VR69	Liver Metastasis
132	V2	LN metastasis of patient VR68	Lymph Node Metastasis
133	V3	VR69	primary tumor	ACTH	none	F	38	sporadic	Body/Tail	malignant	0.03	NET-G2
134	V4	Liver metastasis of patient VR57	Liver Metastasis
135	V5	Liver metastasis of patient VR69	Liver Metastasis
136	V6	LN metastasis of patient VR23	Lymph Node Metastasis
137	V8	Liver metastasis of patient VR51	Liver Metastasis
138	V9	LN metastasis of patient VR45	Lymph node Metastasis
* Malignancy refers to the presence of metastasis to lymph nodes or liver and vascular invasion.
